# Supplementary material
Source: Springer Nature journal article supplement (https://www.springermedizin.de/resource/supplementary/12883_2014_990_MOESM2_ESM.pdf/9456622)
Supplement: MOESM2 [file 9456622]

Online screening procedure

Invitation to participate

Contact through telephone to  
answer possible questions

Patients sign informed  
consent and a form to request  
medical information

Patients start with the  
baseline assessment (**T0**)

Researchers inform the  
general practitioner and  
treating physician. They also  
request relevant medical  
information

Exclusion:

- Age <18
- Suicidal ideation
- CES-D <12
- No access to internet
